# Supplementary material
Source: publisher figshare collection journal article supplement (https://tandf.figshare.com/ndownloader/files/20802561)
Supplement: Supplementary file 1 [file 20802561]

### Supplementary Table 1 Cochrane risk of bias assessment

[illegible]
